# Supplementary material for: HDAC5 Inhibitors as a Potential Treatment in Breast Cancer Affecting Very Young Women
Source: PubMed Central journal article supplement (PMC7072585; doi:10.3390/cancers12020412), 2020-02-10

Figure S1

A)

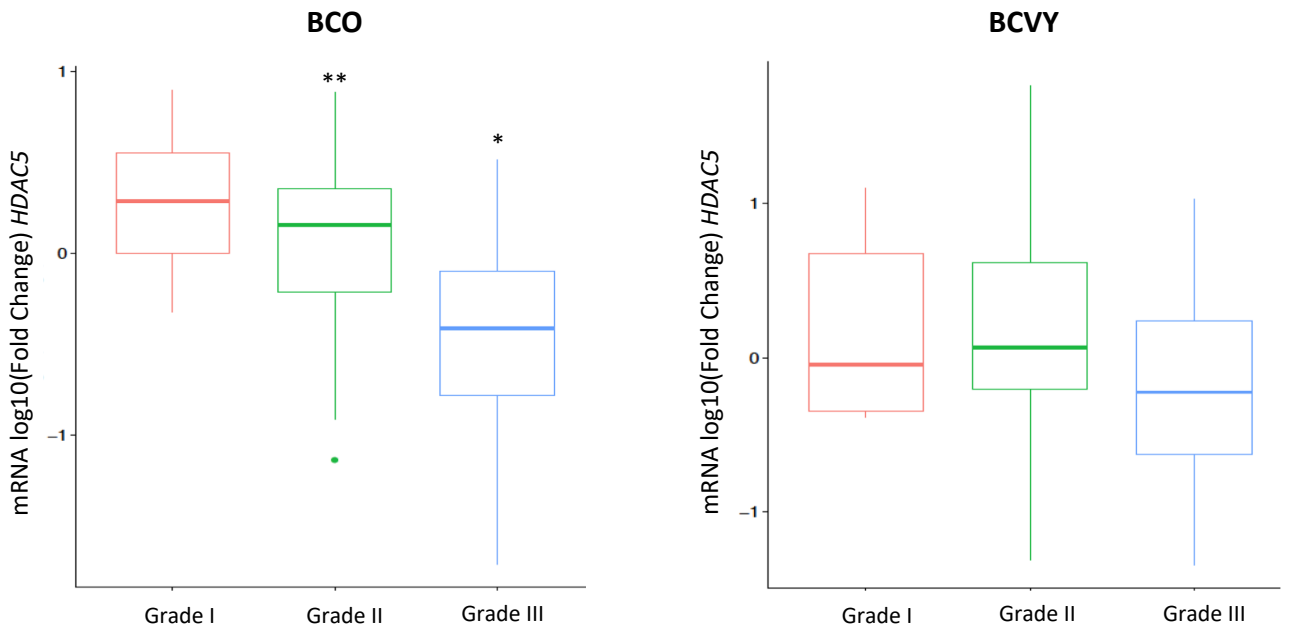

B)

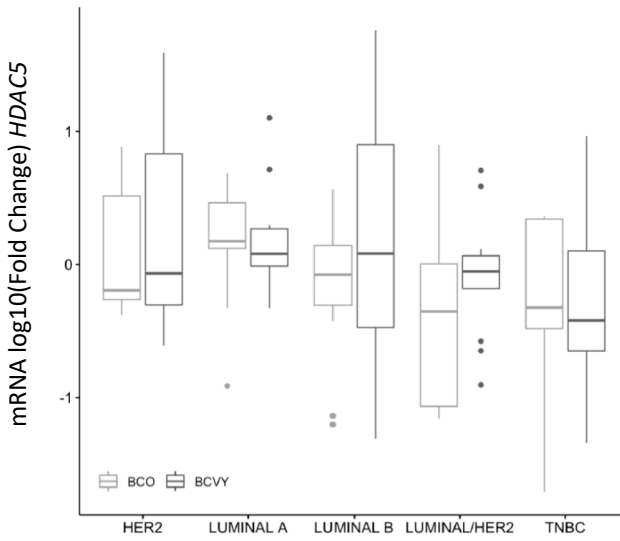

Supplement: cancers-12-00412-s001.pdf [file cancers-12-00412-s001.pdf]
